# Supplementary material for: Physical activity and health in Chinese children and adolescents: expert consensus statement (2020)
Source: PubMed Central journal article supplement — Br J Sports Med. 2020 May 29;54(22):1321–31. doi: 10.1136/bjsports-2020-102261 (PMC7606574; doi:10.1136/bjsports-2020-102261), 2020-05-29
Supplement: bjsports-2020-102261supp001.pdf [file bjsports-2020-102261supp001.pdf]

## Online supplementary appendix 1

Physical activity and health in Chinese children adolescents: expert consensus statement (2020)

Cite as: Chen P, Wang D, Shen H, et al *Br J Sports Med* 2020;:1–11. doi: bjsports-2020-102261

### Eligibility criteria

The following criteria were applied:

1. children and adolescents aged 5 through 17
2. individual studies, systematic reviews, consensus statements, and meta-analyses. Major individual research studies included those using cross-sectional, short- and long-term population-based observational and/or prospective designs, and randomised controlled intervention designs that involved school-aged children and adolescents aged 5 through 17.

### Search terms

We used search terms relevant to:

1. childhood (child\*, youth, adolescen\*, teen\*, boy\*, girl\*),
2. an activity intervention (physical activity, activ\*, exercis\*, training, sports, sedentary, obesity, overweight, BMI),
3. type of studies or articles:
  - a. systematic reviews, consensus statements, and meta-analyses;
  - b. trials (randomised, controlled, trial, RCT, intervention);
  - c. studies of cross-sectional, short- and long-term population-based observational and/or prospective designs
4. an objective measure of activity (objective\*, acceleromet\*, actigraph, MTI, CSA, actical, actiheart, MVPA).

### Search databases

An extensive electronic search of the literature was conducted using the following databases: EBSCO (Academic Search Complete, CINAHL Plus, MEDLINE, PsycINFO, SportDISCUS), PubMed, CNKI, Cochrane Library, EMBASE, SinoMed, and Web of Science. No restrictions were imposed with regard to publication date.

### Initial assessment

Two reviewers independently assessed each abstract retrieved from this electronic search for potentially eligible studies specified by the steering committee. We subsequently obtained full text for studies and articles that seemed to be potentially eligible. We compared the abstracts selected for full text retrieval by each reviewer at this stage and resolved any discrepancies by discussion. The same two reviewers independently assessed the full text articles and selected studies and articles that met the eligibility criteria, again resolving any discrepancies by discussion. We also searched the reference lists of relevant review articles and of the articles that met the eligibility criteria.
